# Supplementary material
Source: PubMed Central journal article supplement (PMC6113457)

**Table S1.** Demographics characteristics of infected patients

| Patient | Sex | Birth weight (g) | Gestational age (weeks) | Chronological age (days) | cGA (weeks) | CA (weeks) |
|---------|-----|------------------|-------------------------|--------------------------|-------------|------------|
| 1       | M   | 870              | 28                      | 74                       | 38 4/7      | n/a        |
| 2       | F   | 810              | 28 2/7                  | 10                       | 29 5/7      | n/a        |
| 3       | M   | 750              | 24 3/7                  | 591                      | n/a         | 68 6/7     |
| 4       | F   | 770              | 25 3/7                  | 14                       | 27 3/7      | n/a        |
| 5       | M   | 900              | 25 2/7                  | 30                       | 29 4/7      | n/a        |
| 6       | M   | 2540             | 36 3/7                  | 59                       | n/a         | 4 6/7      |
| 7       | M   | 3655             | 39                      | 45                       | n/a         | 5 3/7      |

cGA: corrected gestational age; CA: corrected age; n/a: not applicable



**Figure S2.** Correlation between theoretical and experimental relative abundances of bacterial genera in a mock DNA sample for three different marker gene amplicon sequencing protocols

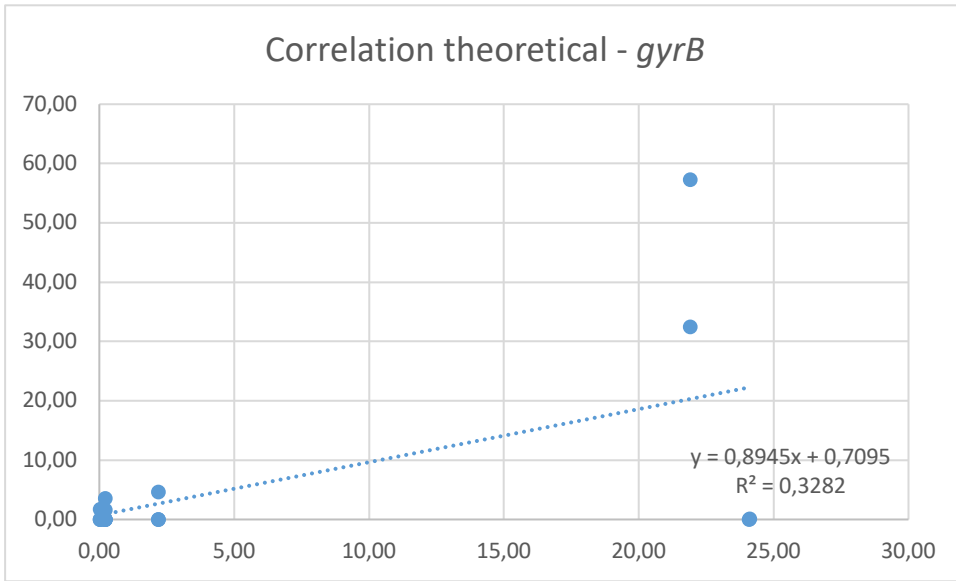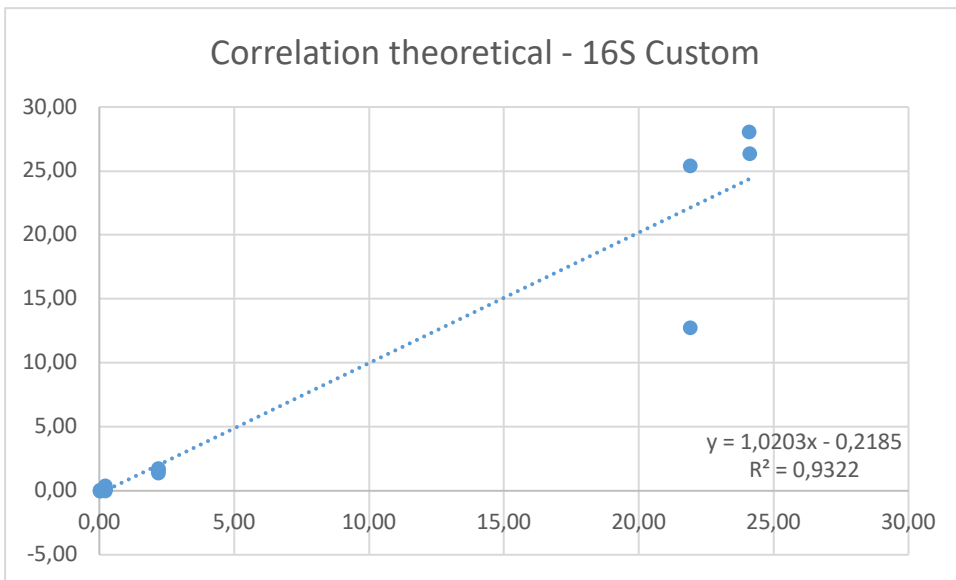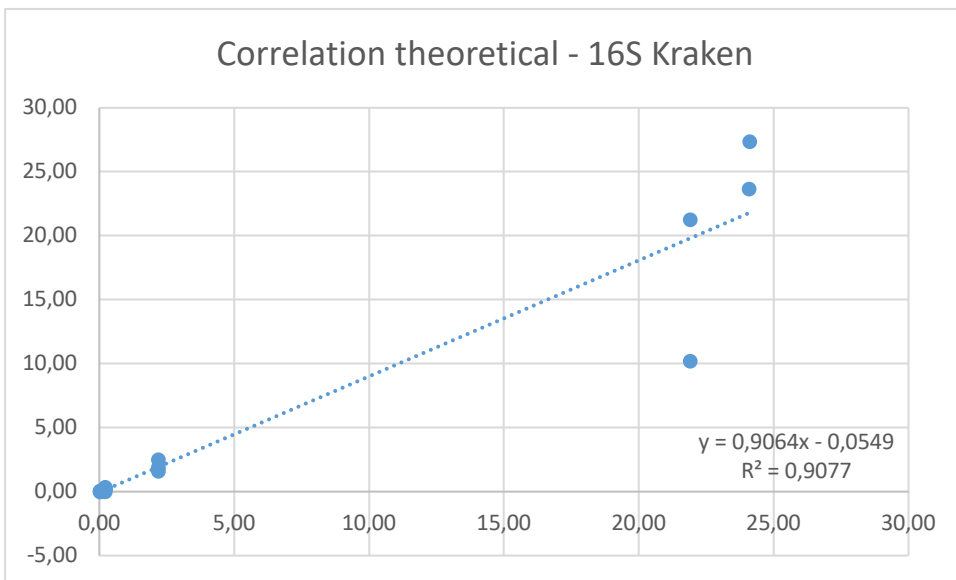

Supplement: zjm999096065s1.pdf [file zjm999096065s1.pdf]
